# Supplementary material for: Social isolation, loneliness, and incident irritable bowel syndrome: a prospective cohort study
Source: Research Square preprint supplement (doi:10.21203/rs.3.rs-6465123/v1), 2025-05-22
Supplement: Supplementary file 1 [file 78d1ea6ca536947d90e6bc4c.docx]

**Social isolation, loneliness, and incident irritable bowel syndrome: a prospective cohort study**

**Supplementary methods**

**Multiple imputation**

After excluding participants with IBS at baseline, lost to follow-up, or missing data on social isolation or loneliness, original dataset of 441114 participants was imputed the missing data through multiple imputation (Markov chain Monte Carlo method). We used correlation matrix to investigate which two covariates tend to have missing values together (Figure S1). Most of the correlation coefficients were very small. Multiple imputation with chained equations were then performed, and all covariates in model 3 were included in the imputation models to create 5 imputed datasets. The pooled HRs from the multiple imputation analysis were calculated in model 3 and are presented in Tables S12 and S13.

**TABLE S1.** Derivation of dietary habit.

| **Food frequency questionnaire** | **Field codes** |
| --- | --- |
| 1. Fruits: ≥ 3 servings/day | 1309, 1319 |
| 2. Vegetables: ≥ 3 servings/day | 1289, 1299 |
| 3. Fish: ≥ 2 servings/week | 1329, 1339 |
| 4. Processed meats: ≤ 1 servings/week | 1349 |
| 5. Unprocessed red meats: ≤ 1.5 servings/week | 1369, 1379, 1389 |
| 6. Whole grains: ≥ 3 servings/day | 1438, 1448, 1458, 1468 |
| 7. Refined grains: ≤ 1.5 servings/day |

Healthy diet: ≥ 4 of the 7 food groups; poor diet: < 4 of the 7 food groups.

**TABLE S2.** Definition of risk factor variables from the UK Biobank study.

| **Variable** | **Field ID** | **How it was used** |
| --- | --- | --- |
| Sex | 31 | Dummy variable:  Female: 0  Male: 1 |
| Age | 21003 | Continuous variable |
| Ethnicity | 21000 | Dummy variable:  Other: 0  White, British, Irish, any other White background: 1 |
| Education | 6138 | Dummy variable:  Other: 0  College or university degree: 1 |
| Townsend deprivation index | 22189 | Continuous variable |
| Alcohol intake | 1558 | Dummy variable:  Low (once or twice a week, one to three times a month, special occasions only, never): 0  High (daily or almost daily, three or four times a week): 1 |
| Current smoker | 20116 | Dummy variable:  No (never, previous): 0  Yes (current): 1 |
| Dietary habit | 1309, 1319, 1289, 1299, 1329, 1339, 1349, 1369, 1379, 1389, 1438, 1448, 1458, 1468 | Dummy variable:  Poor diet: 0  Healthy diet: 1 |
| Body mass index | 21001 | Continuous variable |
| Physical activity | 22036 | Dummy variable:  At or above moderate/vigorous/walking recommendation  No: 0  Yes: 1 |
| Depressed mood | 2050 | Dummy variable:  Low (not at all, several days): 0  High (more than half of my days, nearly every day): 1 |
| Long-term illness | 2188 | Dummy variable:  No: 0  Yes: 1 |
| Loneliness | 2020, 2110 | Loneliness, isolation: 1 point for often feeling lonely, able to confide: 1 point for never or almost never.  Dummy variable:  No (0-1 point): 0  Yes (2 points): 1 |
| Social isolation | 709, 1031, 6160 | Number in household: 1 point for living alone, Frequency of friend/family visits: 1 point for less than one friend or family visit per month, Leisure/social activities: 1 point for not participating in any social activities at least weekly.  Dummy variable:  No (0-1 point): 0  Yes (2-3 points): 1 |

**TABLE S3.** The AIC and BIC in model selection.

|  | **Model 1** | **Model 2** | **Model 3** |
| --- | --- | --- | --- |
| **Separate effects** | | | |
| Social isolation | | | |
| AIC | 247306.26 | 247132.62 | 247021.80 |
| BIC | 247327.77 | 247182.80 | 247100.65 |
| Loneliness | | | |
| AIC | 247239.79 | 247074.55 | 246965.29 |
| BIC | 247261.29 | 247124.73 | 247044.15 |
| **Joint effects** | | | |
| AIC | 247217.51 | 247061.05 | 246957.93 |
| BIC | 247253.35 | 247125.57 | 247051.13 |

AIC, Akaike information criterion; BIC, Bayesian information criterion.

**TABLE S4.** Risk of IBS according to groups of social isolation in different category of loneliness and according to groups of loneliness in different category of social isolation.

|  | **N (case)** | **N (total)** | **Model 1**  **HR (95% CI)** | **Model 2**  **HR (95% CI)** | **Model 3**  **HR (95% CI)** |
| --- | --- | --- | --- | --- | --- |
| No loneliness | 8943 | 420249 |  |  |  |
| Non-isolated |  |  | 1.00 [Ref] | 1.00 [Ref] | 1.00 [Ref] |
| Isolated |  |  | 1.21 (1.12-1.29) | 1.17 (1.09-1.25) | 1.13 (1.05-1.22) |
| Loneliness | 650 | 20865 |  |  |  |
| Non-isolated |  |  | 1.00 [Ref] | 1.00 [Ref] | 1.00 [Ref] |
| Isolated |  |  | 1.07 (0.89-1.28) | 1.05 (0.87-1.26) | 1.02 (0.85-1.23) |
| Non-isolated | 8582 | 401116 |  |  |  |
| No loneliness |  |  | 1.00 [Ref] | 1.00 [Ref] | 1.00 [Ref] |
| Loneliness |  |  | 1.56 (1.42-1.71) | 1.49 (1.36-1.63) | 1.46 (1.33-1.60) |
| Isolated | 1011 | 39998 |  |  |  |
| No loneliness |  |  | 1.00 [Ref] | 1.00 [Ref] | 1.00 [Ref] |
| Loneliness |  |  | 1.37 (1.16-1.62) | 1.33 (1.12-1.57) | 1.31 (1.10-1.55) |
| *P* interaction |  |  | 0.2305 | 0.2578 | 0.2728 |

Model 1: adjusted for age and sex. Model 2: adjusted for age, sex, ethnicity, BMI, education level, and TDI. Model 3: adjusted for age, sex, ethnicity, BMI, education level, TDI, currently smoking, alcohol drinking, physical activity, and healthy diet. IBS, irritable bowel syndrome; HR, hazard ratio; CI, confidence interval; TDI, Townsend index tertile; BMI, body mass index.

**TABLE S5.** Subgroup analyses of the association between loneliness and the risk of IBS.

|  | **N (case)** | **N (total)** | **Loneliness** | | ***P* interaction** |
| --- | --- | --- | --- | --- | --- |
| **No loneliness** | **Loneliness** |
| **Age groups, years** | | | | | 0.5164 |
| < 50 | 2331 | 103212 | 1.00 [Ref] | 1.47 (1.26-1.72) |  |
| 50-59 | 3319 | 146711 | 1.00 [Ref] | 1.39 (1.21-1.59) |  |
| 60 and older | 3943 | 191191 | 1.00 [Ref] | 1.47 (1.29-1.68) |  |
| **Sex** | | | | | 0.4744 |
| Female | 6818 | 236195 | 1.00 [Ref] | 1.39 (1.26-1.54) |  |
| Male | 2775 | 204919 | 1.00 [Ref] | 1.56 (1.36-1.79) |  |
| **Ethnicity** | | | | | 0.4892 |
| Non-White | 407 | 20636 | 1.00 [Ref] | 1.30 (0.91-1.87) |  |
| White | 9186 | 420478 | 1.00 [Ref] | 1.45 (1.34-1.58) |  |
| **Body mass index, kg/m2** | | | | | 0.0564 |
| < 18.5 | 66 | 2157 | 1.00 [Ref] | 1.80 (0.85-3.83) |  |
| 18.5-24.9 | 3199 | 142716 | 1.00 [Ref] | 1.57 (1.36-1.83) |  |
| 25-29.9 | 3818 | 189468 | 1.00 [Ref] | 1.44 (1.26-1.64) |  |
| > 29.9 | 2510 | 106773 | 1.00 [Ref] | 1.32 (1.14-1.52) |  |
| **Education** | | | | | 0.5298 |
| College | 2683 | 145670 | 1.00 [Ref] | 1.37 (1.14-1.65) |  |
| Non-college | 6910 | 295444 | 1.00 [Ref] | 1.46 (1.34-1.60) |  |
| **Current smoker** | | | | | 0.9328 |
| No | 8548 | 395163 | 1.00 [Ref] | 1.44 (1.32-1.57) |  |
| Yes | 1045 | 45951 | 1.00 [Ref] | 1.50 (1.24-1.82) |  |
| **Alcohol intake*a*** | | | | | 0.5932 |
| Low | 6070 | 245616 | 1.00 [Ref] | 1.46 (1.32-1.60) |  |
| High | 3523 | 195498 | 1.00 [Ref] | 1.42 (1.22-1.65) |  |
| **Townsend index tertile*b*** | | | | | 0.1903 |
| Bottom | 3007 | 147226 | 1.00 [Ref] | 1.61 (1.37-1.88) |  |
| Intermediate | 3154 | 147127 | 1.00 [Ref] | 1.42 (1.23-1.65) |  |
| Top | 3432 | 146761 | 1.00 [Ref] | 1.37 (1.22-1.55) |  |

HRs were calculated through model 3, adjusted for age, sex, ethnicity, BMI, education level, TDI, currently smoking, alcohol drinking, physical activity, and healthy diet. IBS, irritable bowel syndrome; HR, hazard ratio; CI, confidence interval; TDI, Townsend index tertile; BMI, body mass index.

*a*Alcohol intake was defined as low (once or twice a week, one to three times a month, special occasions only, never) and high (daily or almost daily, three or four times a week).

*b*Townsend index tertile was dichotomized as bottom (≤ -3.18), intermediate (-3.18 ~ -0.7), and top (> -0.7).

**TABLE S6.** Subgroup analyses of the association between social isolation and the risk of IBS.

|  | **N (case)** | **N (total)** | **Social isolation** | | ***P* interaction** |
| --- | --- | --- | --- | --- | --- |
| **Non-isolated** | **Isolated** |
| **Age groups, years** | | | | | 0.3663 |
| < 50 | 2331 | 103212 | 1.00 [Ref] | 1.08 (0.94-1.25) |  |
| 50-59 | 3319 | 146711 | 1.00 [Ref] | 1.11 (1.00-1.24) |  |
| 60 and older | 3943 | 191191 | 1.00 [Ref] | 1.24 (1.12-1.37) |  |
| **Sex** | | | | | 0.0528 |
| Female | 6818 | 236195 | 1.00 [Ref] | 1.08 (1.00-1.18) |  |
| Male | 2775 | 204919 | 1.00 [Ref] | 1.30 (1.16-1.46) |  |
| **Ethnicity** | | | | | 0.0649 |
| Non-White | 407 | 20636 | 1.00 [Ref] | 1.50 (1.16-1.94) |  |
| White | 9186 | 420478 | 1.00 [Ref] | 1.13 (1.06-1.21) |  |
| **Body mass index, kg/m2** | | | | | 0.4526 |
| < 18.5 | 66 | 2157 | 1.00 [Ref] | 1.17 (0.62-2.21) |  |
| 18.5-24.9 | 3199 | 142716 | 1.00 [Ref] | 1.10 (0.98-1.24) |  |
| 25-29.9 | 3818 | 189468 | 1.00 [Ref] | 1.13 (1.01-1.26) |  |
| > 29.9 | 2510 | 106773 | 1.00 [Ref] | 1.20 (1.07-1.35) |  |
| **Education** | | | | | 0.1626 |
| College | 2683 | 145670 | 1.00 [Ref] | 1.26 (1.11-1.43) |  |
| Non-college | 6910 | 295444 | 1.00 [Ref] | 1.12 (1.03-1.21) |  |
| **Current smoker** | | | | | 0.4551 |
| No | 8548 | 395163 | 1.00 [Ref] | 1.16 (1.08-1.25) |  |
| Yes | 1045 | 45951 | 1.00 [Ref] | 1.12 (0.96-1.32) |  |
| **Alcohol intake*a*** | | | | | 0.5149 |
| Low | 6070 | 245616 | 1.00 [Ref] | 1.16 (1.08-1.26) |  |
| High | 3523 | 195498 | 1.00 [Ref] | 1.12 (0.98-1.27) |  |
| **Townsend index tertile*b*** | | | | | 0.8739 |
| Bottom | 3007 | 147226 | 1.00 [Ref] | 1.20 (1.04-1.38) |  |
| Intermediate | 3154 | 147127 | 1.00 [Ref] | 1.10 (0.97-1.25) |  |
| Top | 3432 | 146761 | 1.00 [Ref] | 1.16 (1.06-1.28) |  |

HRs were calculated through model 3, adjusted for age, sex, ethnicity, BMI, education level, TDI, currently smoking, alcohol drinking, physical activity, and healthy diet. IBS, irritable bowel syndrome; HR, hazard ratio; CI, confidence interval; TDI, Townsend index tertile; BMI, body mass index.

*a*Alcohol intake was defined as low (once or twice a week, one to three times a month, special occasions only, never) and high (daily or almost daily, three or four times a week).

*b*Townsend index tertile was dichotomized as bottom (≤ -3.18), intermediate (-3.18 ~ -0.7), and top (> -0.7).

**TABLE S7.** Subgroup analyses of the joint association of social isolation and loneliness with IBS risk.

|  | **N (case)** | **N (total)** | **HR (95%CI)** | ***P* interaction** |
| --- | --- | --- | --- | --- |
| **Age groups, years** | | | | 0.9429 |
| < 50 | 2331 | 103212 |  |  |
| No loneliness |  |  |  |  |
| Non-isolated |  |  | 1.00 [Ref] |  |
| Isolated |  |  | 1.09 (0.93-1.27) |  |
| Loneliness |  |  |  |  |
| Non-isolated |  |  | 1.53 (1.29-1.82) |  |
| Isolated |  |  | 1.29 (0.92-1.81) |  |
| 50-59 | 3319 | 146711 |  |  |
| No loneliness |  |  |  |  |
| Non-isolated |  |  | 1.00 [Ref] |  |
| Isolated |  |  | 1.09 (0.97-1.23) |  |
| Loneliness |  |  |  |  |
| Non-isolated |  |  | 1.39 (1.19-1.62) |  |
| Isolated |  |  | 1.44 (1.11-1.85) |  |
| 60 and older | 3943 | 191191 |  |  |
| No loneliness |  |  |  |  |
| Non-isolated |  |  | 1.00 [Ref] |  |
| Isolated |  |  | 1.21 (1.08-1.35) |  |
| Loneliness |  |  |  |  |
| Non-isolated |  |  | 1.45 (1.25-1.68) |  |
| Isolated |  |  | 1.67 (1.30-2.15) |  |
| **Sex** | | | | 0.1489 |
| Female | 6818 | 236195 |  |  |
| No loneliness |  |  |  |  |
| Non-isolated |  |  | 1.00 [Ref] |  |
| Isolated |  |  | 1.07 (0.98-1.17) |  |
| Loneliness |  |  |  |  |
| Non-isolated |  |  | 1.41 (1.26-1.58) |  |
| Isolated |  |  | 1.39 (1.13-1.71) |  |
| Male | 2775 | 204919 |  |  |
| No loneliness |  |  |  |  |
| Non-isolated |  |  | 1.00 [Ref] |  |
| Isolated |  |  | 1.28 (1.13-1.45) |  |
| Loneliness |  |  |  |  |
| Non-isolated |  |  | 1.58 (1.35-1.85) |  |
| Isolated |  |  | 1.69 (1.32-2.16) |  |
| **Ethnicity** | | | | 0.7116 |
| Non-White | 407 | 20636 |  |  |
| No loneliness |  |  |  |  |
| Non-isolated |  |  | 1.00 [Ref] |  |
| Isolated |  |  | 1.44 (1.09-1.91) |  |
| Loneliness |  |  |  |  |
| Non-isolated |  |  | 1.15 (0.72-1.83) |  |
| Isolated |  |  | 1.94 (1.11-3.39) |  |
| White | 9186 | 420478 |  |  |
| No loneliness |  |  |  |  |
| Non-isolated |  |  | 1.00 [Ref] |  |
| Isolated |  |  | 1.12 (1.04-1.20) |  |
| Loneliness |  |  |  |  |
| Non-isolated |  |  | 1.48 (1.34-1.62) |  |
| Isolated |  |  | 1.46 (1.23-1.72) |  |
| **Body mass index, kg/m2** | | | | 0.2492 |
| < 18.5 | 66 | 2157 |  |  |
| No loneliness |  |  |  |  |
| Non-isolated |  |  | 1.00 [Ref] |  |
| Isolated |  |  | 1.30 (0.65-2.57) |  |
| Loneliness |  |  |  |  |
| Non-isolated |  |  | 2.46 (1.04-5.81) |  |
| Isolated |  |  | 1.12 (0.27-4.74) |  |
| 18.5-24.9 | 3199 | 142716 |  |  |
| No loneliness |  |  |  |  |
| Non-isolated |  |  | 1.00 [Ref] |  |
| Isolated |  |  | 1.06 (0.93-1.21) |  |
| Loneliness |  |  |  |  |
| Non-isolated |  |  | 1.55 (1.31-1.84) |  |
| Isolated |  |  | 1.68 (1.27-2.24) |  |
| 25-29.9 | 3818 | 189468 |  |  |
| No loneliness |  |  |  |  |
| Non-isolated |  |  | 1.00 [Ref] |  |
| Isolated |  |  | 1.12 (1.00-1.26) |  |
| Loneliness |  |  |  |  |
| Non-isolated |  |  | 1.47 (1.27-1.71) |  |
| Isolated |  |  | 1.39 (1.05-1.83) |  |
| > 29.9 | 2510 | 106773 |  |  |
| No loneliness |  |  |  |  |
| Non-isolated |  |  | 1.00 [Ref] |  |
| Isolated |  |  | 1.20 (1.05-1.36) |  |
| Loneliness |  |  |  |  |
| Non-isolated |  |  | 1.33 (1.13-1.57) |  |
| Isolated |  |  | 1.40 (1.08-1.83) |  |
| **Education** | | | | 0.7985 |
| College | 2683 | 145670 |  |  |
| No loneliness |  |  |  |  |
| Non-isolated |  |  | 1.00 [Ref] |  |
| Isolated |  |  | 1.19 (1.04-1.36) |  |
| Loneliness |  |  |  |  |
| Non-isolated |  |  | 1.21 (0.97-1.52) |  |
| Isolated |  |  | 1.99 (1.45-2.73) |  |
| Non-college | 6910 | 295444 |  |  |
| No loneliness |  |  |  |  |
| Non-isolated |  |  | 1.00 [Ref] |  |
| Isolated |  |  | 1.12 (1.03-1.21) |  |
| Loneliness |  |  |  |  |
| Non-isolated |  |  | 1.51 (1.37-1.68) |  |
| Isolated |  |  | 1.36 (1.14-1.64) |  |
| **Current smoker** | | | | 0.8004 |
| No | 8548 | 395163 |  |  |
| No loneliness |  |  |  |  |
| Non-isolated |  |  | 1.00 [Ref] |  |
| Isolated |  |  | 1.15 (1.06-1.24) |  |
| Loneliness |  |  |  |  |
| Non-isolated |  |  | 1.46 (1.32-1.62) |  |
| Isolated |  |  | 1.45 (1.21-1.74) |  |
| Yes | 1045 | 45951 |  |  |
| No loneliness |  |  |  |  |
| Non-isolated |  |  | 1.00 [Ref] |  |
| Isolated |  |  | 1.07 (0.89-1.28) |  |
| Loneliness |  |  |  |  |
| Non-isolated |  |  | 1.46 (1.15-1.85) |  |
| Isolated |  |  | 1.65 (1.21-2.26) |  |
| **Alcohol intake*a*** | | | | 0.4296 |
| Low | 6070 | 245616 |  |  |
| No loneliness |  |  |  |  |
| Non-isolated |  |  | 1.00 [Ref] |  |
| Isolated |  |  | 1.15 (1.05-1.25) |  |
| Loneliness |  |  |  |  |
| Non-isolated |  |  | 1.47 (1.32-1.64) |  |
| Isolated |  |  | 1.51 (1.26-1.80) |  |
| High | 3523 | 195498 |  |  |
| No loneliness |  |  |  |  |
| Non-isolated |  |  | 1.00 [Ref] |  |
| Isolated |  |  | 1.10 (0.96-1.26) |  |
| Loneliness |  |  |  |  |
| Non-isolated |  |  | 1.43 (1.21-1.69) |  |
| Isolated |  |  | 1.41 (1.01-1.97) |  |
| **Townsend index tertile*b*** | | | | 0.2688 |
| Bottom | 3007 | 147226 |  |  |
| No loneliness |  |  |  |  |
| Non-isolated |  |  | 1.00 [Ref] |  |
| Isolated |  |  | 1.20 (1.03-1.40) |  |
| Loneliness |  |  |  |  |
| Non-isolated |  |  | 1.65 (1.40-1.96) |  |
| Isolated |  |  | 1.46 (0.97-2.21) |  |
| Intermediate | 3154 | 147127 |  |  |
| No loneliness |  |  |  |  |
| Non-isolated |  |  | 1.00 [Ref] |  |
| Isolated |  |  | 1.08 (0.94-1.24) |  |
| Loneliness |  |  |  |  |
| Non-isolated |  |  | 1.44 (1.22-1.70) |  |
| Isolated |  |  | 1.41 (1.02-1.95) |  |
| Top | 3432 | 146761 |  |  |
| No loneliness |  |  |  |  |
| Non-isolated |  |  | 1.00 [Ref] |  |
| Isolated |  |  | 1.13 (1.02-1.25) |  |
| Loneliness |  |  |  |  |
| Non-isolated |  |  | 1.35 (1.17-1.56) |  |
| Isolated |  |  | 1.51 (1.24-1.85) |  |

HRs were calculated through model 3, adjusted for age, sex, ethnicity, BMI, education level, TDI, currently smoking, alcohol drinking, physical activity, and healthy diet. IBS, Irritable bowel syndrome; HR, hazard ratio; CI, confidence interval; TDI, Townsend index tertile; BMI, body mass index.

*a*Alcohol intake was defined as low (once or twice a week, one to three times a month, special occasions only, never) and high (daily or almost daily, three or four times a week).

*b*Townsend index tertile was dichotomized as bottom (≤ -3.18), intermediate (-3.18 ~ -0.7), and top (> -0.7).

**TABLE S8.** Separate and joint association of social isolation and loneliness with subsequent IBS (excluding participants who developed IBS within the first 3 years).

|  | **N (case)** | **N (total)** | **HR (95% CI)** | ***P* value** |
| --- | --- | --- | --- | --- |
| **Separate effects** | 7366 | 435151 |  |  |
| Social isolation |  |  |  |  |
| Non-isolated |  |  | 1.00 [Ref] |  |
| Isolated |  |  | 1.13 (1.05-1.22) | 0.0012 |
| Loneliness |  |  |  |  |
| No loneliness |  |  | 1.00 [Ref] |  |
| Loneliness |  |  | 1.44 (1.31-1.58) | <0.0001 |
| **Joint effects** | 7366 | 435151 |  |  |
| No loneliness |  |  |  |  |
| Non-isolated |  |  | 1.00 [Ref] |  |
| Isolated |  |  | 1.12 (1.03-1.21) | 0.0089 |
| Loneliness |  |  |  |  |
| Non-isolated |  |  | 1.45 (1.31-1.61) | <0.0001 |
| Isolated |  |  | 1.46 (1.22-1.76) | <0.0001 |
| *P* trend |  |  |  | <0.0001 |

HRs were calculated through model 3, adjusted for age, sex, ethnicity, BMI, education level, TDI, currently smoking, alcohol drinking, physical activity, and healthy diet. IBS, irritable bowel syndrome; HR, hazard ratio; CI, confidence interval; TDI, Townsend index tertile; BMI, body mass index.

**TABLE S9.** Association of social isolation with IBS risk according to different categories of loneliness and association of loneliness with IBS risk according to different categories of social isolation (excluding participants who developed IBS within the first 3 years).

|  | **N (case)** | **N (total)** | **HR (95% CI)** | ***P* value** |
| --- | --- | --- | --- | --- |
| No loneliness | 6871 | 414681 |  |  |
| Non-isolated |  |  | 1.00 [Ref] |  |
| Isolated |  |  | 1.11 (1.03-1.21) | 0.0102 |
| Loneliness | 495 | 20470 |  |  |
| Non-isolated |  |  | 1.00 [Ref] |  |
| Isolated |  |  | 1.02 (0.83-1.26) | 0.8349 |
| Non-isolated | 6600 | 396029 |  |  |
| No loneliness |  |  | 1.00 [Ref] |  |
| Loneliness |  |  | 1.45 (1.31-1.61) | < 0.0001 |
| Isolated | 766 | 39122 |  |  |
| No loneliness |  |  | 1.00 [Ref] |  |
| Loneliness |  |  | 1.31 (1.08-1.59) | 0.0074 |
| *P* interaction |  |  | 0.2728 |  |

HRs were calculated through model 3, adjusted for age, sex, ethnicity, BMI, education level, TDI, currently smoking, alcohol drinking, physical activity, and healthy diet. IBS, irritable bowel syndrome; HR, hazard ratio; CI, confidence interval; TDI, Townsend index tertile; BMI, body mass index.

**TABLE S10.** Separate and joint association of social isolation and loneliness with subsequent IBS (excluding participants with missing data on social isolation, loneliness, and covariates).

|  | **N (case)** | **N (total)** | **HR (95% CI)** | ***P* value** |
| --- | --- | --- | --- | --- |
| **Separate effects** | 5565 | 272717 |  |  |
| Social isolation |  |  |  |  |
| Non-isolated |  |  | 1.00 [Ref] |  |
| Isolated |  |  | 1.19 (1.08-1.30) | 0.0003 |
| Loneliness |  |  |  |  |
| No loneliness |  |  | 1.00 [Ref] |  |
| Loneliness |  |  | 1.46 (1.30-1.63) | <0.0001 |
| **Joint effects** | 5565 | 272717 |  |  |
| No loneliness |  |  |  |  |
| Non-isolated |  |  | 1.00 [Ref] |  |
| Isolated |  |  | 1.17 (1.06-1.29) | 0.0018 |
| Loneliness |  |  |  |  |
| Non-isolated |  |  | 1.47 (1.30-1.67) | <0.0001 |
| Isolated |  |  | 1.52 (1.20-1.91) | 0.0005 |
| *P* trend |  |  |  | <0.0001 |

HRs were calculated through model 3, adjusted for age, sex, ethnicity, BMI, education level, TDI, currently smoking, alcohol drinking, physical activity, and healthy diet. IBS, irritable bowel syndrome; HR, hazard ratio; CI, confidence interval; TDI, Townsend index tertile; BMI, body mass index.

**TABLE S11.** Association of social isolation with IBS risk according to different categories of loneliness and association of loneliness with IBS risk according to different categories of social isolation (excluding participants with missing data on social isolation, loneliness and covariates).

|  | **N (case)** | **N (total)** | **HR (95% CI)** | ***P* value** |
| --- | --- | --- | --- | --- |
| No loneliness | 5236 | 261648 |  |  |
| Non-isolated |  |  | 1.00 [Ref] |  |
| Isolated |  |  | 1.17 (1.06-1.29) | 0.0022 |
| Loneliness | 329 | 11069 |  |  |
| Non-isolated |  |  | 1.00 [Ref] |  |
| Isolated |  |  | 1.07 (0.82-1.40) | 0.6138 |
| Non-isolated | 5046 | 251451 |  |  |
| No loneliness |  |  | 1.00 [Ref] |  |
| Loneliness |  |  | 1.47 (1.29-1.67) | < 0.0001 |
| Isolated | 519 | 21266 |  |  |
| No loneliness |  |  | 1.00 [Ref] |  |
| Loneliness |  |  | 1.30 (1.01-1.67) | 0.0402 |
| *P* interaction |  |  | 0.3711 |  |

HRs were calculated through model 3, adjusted for age, sex, ethnicity, BMI, education level, TDI, currently smoking, alcohol drinking, physical activity, and healthy diet. IBS, irritable bowel syndrome; HR, hazard ratio; CI, confidence interval; TDI, Townsend index tertile; BMI, body mass index.

**TABLE S12.** Separate and joint association of social isolation and loneliness with subsequent IBS based on the multiple imputed datasets.

|  | **N (case)** | **N (total)** | **HR (95% CI)** | ***P* value** |
| --- | --- | --- | --- | --- |
| **Separate effects** | 47965 | 2205570 |  |  |
| Social isolation |  |  |  |  |
| Non-isolated |  |  | 1.00 [Ref] |  |
| Isolated |  |  | 1.15 (1.12-1.19) | <0.0001 |
| Loneliness |  |  |  |  |
| No loneliness |  |  | 1.00 [Ref] |  |
| Loneliness |  |  | 1.46 (1.40-1.51) | <0.0001 |
| **Joint effects** | 47965 | 2205570 |  |  |
| No loneliness |  |  |  |  |
| Non-isolated |  |  | 1.00 [Ref] |  |
| Isolated |  |  | 1.14 (1.10-1.17) | <0.0001 |
| Loneliness |  |  |  |  |
| Non-isolated |  |  | 1.47 (1.41-1.53) | <0.0001 |
| Isolated |  |  | 1.50 (1.40-1.61) | <0.0001 |
| *P* trend |  |  |  | <0.0001 |

HRs were calculated through model 3, adjusted for age, sex, ethnicity, BMI, education level, TDI, currently smoking, alcohol drinking, physical activity, and healthy diet. IBS, irritable bowel syndrome; HR, hazard ratio; CI, confidence interval; TDI, Townsend index tertile; BMI, body mass index.

**TABLE S13.** Association of social isolation with IBS risk according to different categories of loneliness and association of loneliness with IBS risk according to different categories of social isolation based on the multiple imputed datasets.

|  | **N (case)** | **N (total)** | **HR (95% CI)** | ***P* value** |
| --- | --- | --- | --- | --- |
| No loneliness | 44715 | 2101245 |  |  |
| Non-isolated |  |  | 1.00 [Ref] |  |
| Isolated |  |  | 1.14 (1.10-1.17) | < 0.0001 |
| Loneliness | 3250 | 104325 |  |  |
| Non-isolated |  |  | 1.00 [Ref] |  |
| Isolated |  |  | 1.02 (0.94-1.11) | 0.6476 |
| Non-isolated | 42910 | 2005580 |  |  |
| No loneliness |  |  | 1.00 [Ref] |  |
| Loneliness |  |  | 1.47 (1.41-1.53) | < 0.0001 |
| Isolated | 5055 | 199990 |  |  |
| No loneliness |  |  | 1.00 [Ref] |  |
| Loneliness |  |  | 1.31 (1.21-1.41) | < 0.0001 |
| *P* interaction |  |  | 0.0146 |  |

HRs were calculated through model 3, adjusted for age, sex, ethnicity, BMI, education level, TDI, currently smoking, alcohol drinking, physical activity, and healthy diet. IBS, irritable bowel syndrome; HR, hazard ratio; CI, confidence interval; TDI, Townsend index tertile; BMI, body mass index.

**TABLE S14.** Separate and joint association of social isolation and loneliness with subsequent IBS in further adjusted model.

|  | **N (case)** | **N (total)** | **HR (95% CI)** | ***P* value** |
| --- | --- | --- | --- | --- |
| **Separate effects** | 9593 | 441114 |  |  |
| Social isolation |  |  |  |  |
| Non-isolated |  |  | 1.00 [Ref] |  |
| Isolated |  |  | 1.08 (1.01-1.15) | 0.0259 |
| Loneliness |  |  |  |  |
| No loneliness |  |  | 1.00 [Ref] |  |
| Loneliness |  |  | 1.24 (1.14-1.35) | <0.0001 |
| **Joint effects** | 9593 | 441114 |  |  |
| No loneliness |  |  |  |  |
| Non-isolated |  |  | 1.00 [Ref] |  |
| Isolated |  |  | 1.08 (1.00-1.16) | 0.0374 |
| Loneliness |  |  |  |  |
| Non-isolated |  |  | 1.27 (1.15-1.39) | <0.0001 |
| Isolated |  |  | 1.21 (1.03-1.42) | 0.0188 |
| *P* trend |  |  |  | <0.0001 |

HRs were calculated through the model adjusted for age, sex, ethnicity, BMI, education level, TDI, currently smoking, alcohol drinking, physical activity, healthy diet, depressed mood, and long-term illness. IBS, irritable bowel syndrome; HR, hazard ratio; CI, confidence interval; TDI, Townsend index tertile; BMI, body mass index.

**TABLE S15.** Association of social isolation with IBS risk according to different categories of loneliness and association of loneliness with IBS risk according to different categories of social isolation in further adjusted model.

|  | **N (case)** | **N (total)** | **HR (95% CI)** | ***P* value** |
| --- | --- | --- | --- | --- |
| No loneliness | 8943 | 420249 |  |  |
| Non-isolated |  |  | 1.00 [Ref] |  |
| Isolated |  |  | 1.08 (1.00-1.16) | 0.0445 |
| Loneliness | 650 | 20865 |  |  |
| Non-isolated |  |  | 1.00 [Ref] |  |
| Isolated |  |  | 0.98 (0.81-1.17) | 0.7836 |
| Non-isolated | 8582 | 401116 |  |  |
| No loneliness |  |  | 1.00 [Ref] |  |
| Loneliness |  |  | 1.26 (1.15-1.38) | < 0.0001 |
| Isolated | 1011 | 39998 |  |  |
| No loneliness |  |  | 1.00 [Ref] |  |
| Loneliness |  |  | 1.14 (0.96-1.36) | 0.1375 |
| *P* interaction |  |  | 0.2191 |  |

HRs were calculated through the model adjusted for age, sex, ethnicity, BMI, education level, TDI, currently smoking, alcohol drinking, physical activity, healthy diet, depressed mood, and long-term illness. IBS, irritable bowel syndrome; HR, hazard ratio; CI, confidence interval; TDI, Townsend index tertile; BMI, body mass index.

**TABLE S16.** Separate and joint association of social isolation and loneliness with subsequent IBS (excluding participants who died during the follow-up period).

|  | **N (case)** | **N (total)** | **HR (95% CI)** | ***P* value** |
| --- | --- | --- | --- | --- |
| **Separate effects** | 8829 | 402427 |  |  |
| Social isolation |  |  |  |  |
| Non-isolated |  |  | 1.00 [Ref] |  |
| Isolated |  |  | 1.13 (1.05-1.21) | 0.0006 |
| Loneliness |  |  |  |  |
| No loneliness |  |  | 1.00 [Ref] |  |
| Loneliness |  |  | 1.44 (1.32-1.56) | <0.0001 |
| **Joint effects** | 8829 | 402427 |  |  |
| No loneliness |  |  |  |  |
| Non-isolated |  |  | 1.00 [Ref] |  |
| Isolated |  |  | 1.12 (1.03-1.20) | 0.0047 |
| Loneliness |  |  |  |  |
| Non-isolated |  |  | 1.46 (1.32-1.60) | <0.0001 |
| Isolated |  |  | 1.45 (1.22-1.72) | <0.0001 |
| *P* trend |  |  |  | <0.0001 |

HRs were calculated through model 3, adjusted for age, sex, ethnicity, BMI, education level, TDI, currently smoking, alcohol drinking, physical activity, and healthy diet. IBS, irritable bowel syndrome; HR, hazard ratio; CI, confidence interval; TDI, Townsend index tertile; BMI, body mass index.

**TABLE S17.** Association of social isolation with IBS risk according to different categories of loneliness and association of loneliness with IBS risk according to different categories of social isolation (excluding participants who died during the follow-up period).

|  | **N (case)** | **N (total)** | **HR (95% CI)** | ***P* value** |
| --- | --- | --- | --- | --- |
| No loneliness | 8250 | 384123 |  |  |
| Non-isolated |  |  | 1.00 [Ref] |  |
| Isolated |  |  | 1.12 (1.03-1.20) | 0.0052 |
| Loneliness | 579 | 18304 |  |  |
| Non-isolated |  |  | 1.00 [Ref] |  |
| Isolated |  |  | 1.01 (0.83-1.22) | 0.9596 |
| Non-isolated | 7943 | 367831 |  |  |
| No loneliness |  |  | 1.00 [Ref] |  |
| Loneliness |  |  | 1.46 (1.32-1.60) | < 0.0001 |
| Isolated | 886 | 34596 |  |  |
| No loneliness |  |  | 1.00 [Ref] |  |
| Loneliness |  |  | 1.29 (1.08-1.56) | 0.0065 |
| *P* interaction |  |  | 0.2683 |  |

HRs were calculated through model 3, adjusted for age, sex, ethnicity, BMI, education level, TDI, currently smoking, alcohol drinking, physical activity, and healthy diet. IBS, irritable bowel syndrome; HR, hazard ratio; CI, confidence interval; TDI, Townsend index tertile; BMI, body mass index.

**TABLE S18.** Separate and joint association of social isolation and loneliness with subsequent IBS in the Fine-Gray models accounting for a competing risk of death.

|  | **N (case)** | **N (total)** | **HR (95% CI)** | ***P* value** |
| --- | --- | --- | --- | --- |
| **Separate effects** | 8829 | 441114 |  |  |
| Social isolation |  |  |  |  |
| Non-isolated |  |  | 1.00 [Ref] |  |
| Isolated |  |  | 1.10 (1.02-1.18) | 0.0123 |
| Loneliness |  |  |  |  |
| No loneliness |  |  | 1.00 [Ref] |  |
| Loneliness |  |  | 1.40 (1.29-1.53) | <0.0001 |
| **Joint effects** | 8829 | 441114 |  |  |
| No loneliness |  |  |  |  |
| Non-isolated |  |  | 1.00 [Ref] |  |
| Isolated |  |  | 1.08 (1.00-1.17) | 0.0418 |
| Loneliness |  |  |  |  |
| Non-isolated |  |  | 1.43 (1.30-1.57) | <0.0001 |
| Isolated |  |  | 1.37 (1.15-1.63) | 0.0003 |
| *P* trend |  |  |  | <0.0001 |

HRs were calculated through model 3, adjusted for age, sex, ethnicity, BMI, education level, TDI, currently smoking, alcohol drinking, physical activity, and healthy diet. IBS, irritable bowel syndrome; HR, hazard ratio; CI, confidence interval; TDI, Townsend index tertile; BMI, body mass index.


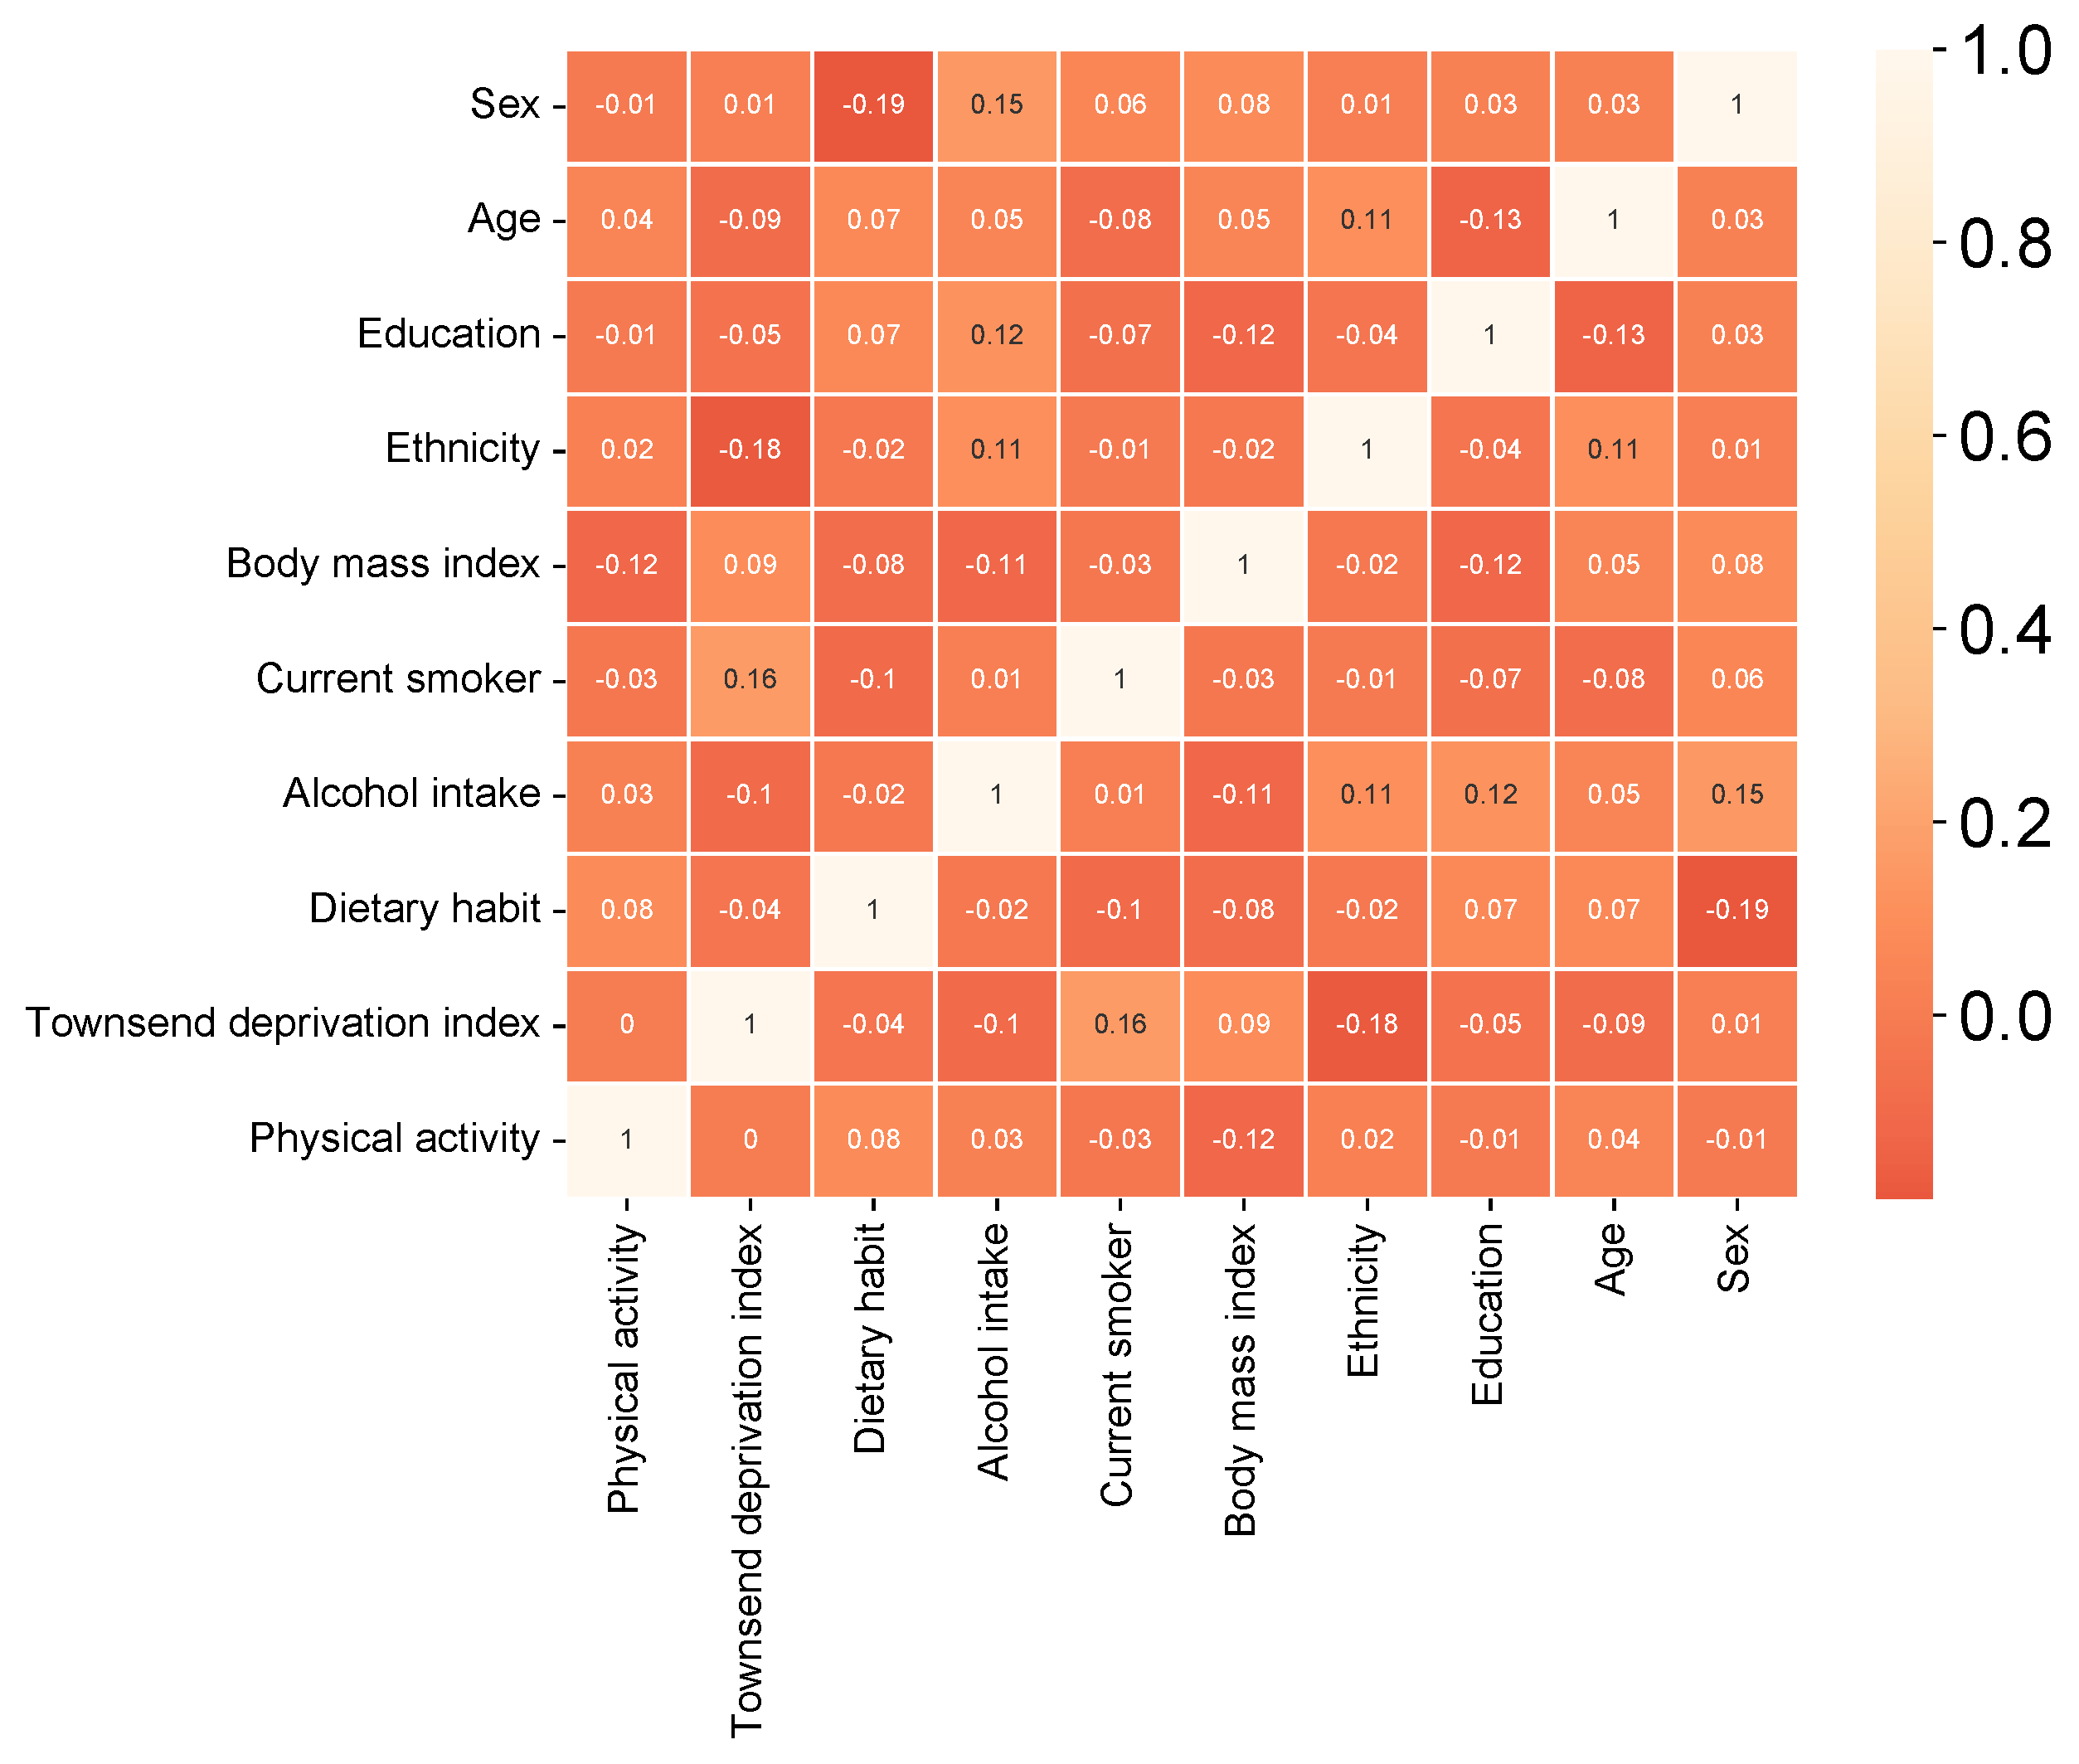


**FIGURE S1.** Correlation matrix showing the missing data pattern.
